# Supplementary material for: Shunt dependency in supratentorial intraventricular tumors depends on the extent of tumor resection
Source: PubMed Central journal article supplement (PMC10068640; doi:10.1007/s00701-023-05532-7), 2023-03-02
Supplement: 701_2023_5532_MOESM1_ESM.pdf [file 701_2023_5532_MOESM1_ESM.pdf]

# Supplementary figure 1

**1536** patients with supratentorial lesions receiving either biopsy or open resection between 2014-2022 assessed for eligibility

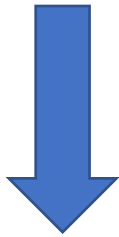

**1464** patients excluded for non-tumorous lesions (e.g., cysts, autoimmune/inflammatory disease) or missing intraventricular location

**72** patients with supratentorial intraventricular tumors operated between 2014-2022

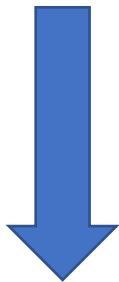

**13** patients excluded  
**10** insufficient imaging data  
**3** no tissue-based diagnosis *per* 2021 WHO classification available

**59** patients with supratentorial intraventricular tumors operated between 2014-2022 included

**13** biopsy  
**13** incomplete resection  
**33** complete resection
