# Supplementary material for: Shunt dependency in supratentorial intraventricular tumors depends on the extent of tumor resection
Source: PubMed Central journal article supplement (PMC10068640; doi:10.1007/s00701-023-05532-7), 2023-03-02

# Supplementary figure 2

## A

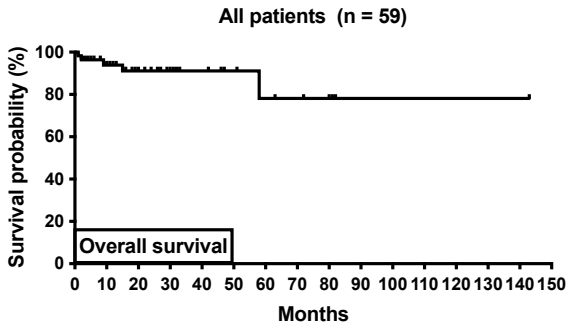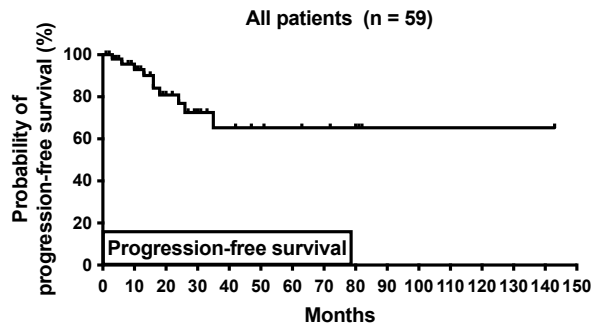

## B

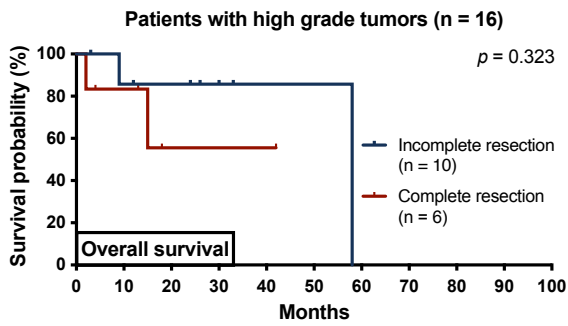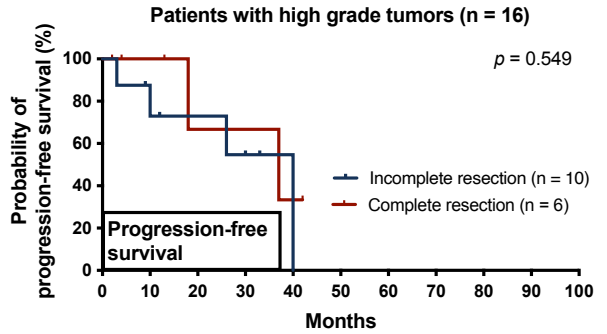

Supplement: 701_2023_5532_MOESM2_ESM.pdf [file 701_2023_5532_MOESM2_ESM.pdf]
